# Supplementary material
Source: Springer Nature journal article supplement (https://www.springermedizin.de/resource/supplementary/12985_2010_1031_MOESM1_ESM.pdf/9608988)

1 2 3 4 5 6 7 8 9 10 11 12

100 bp

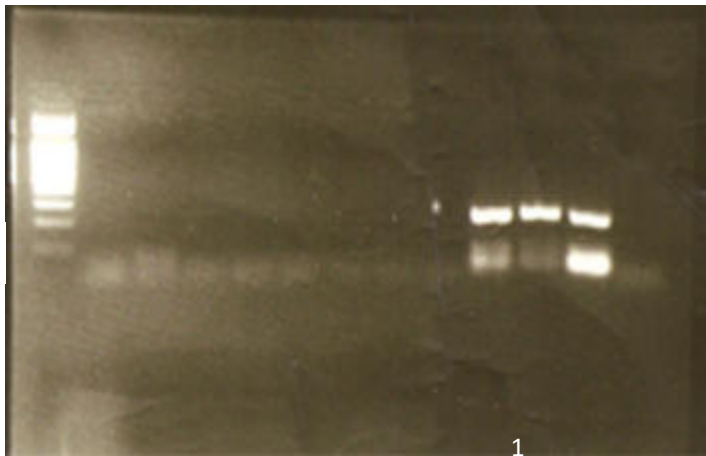

1

Supplement: MOESM1 [file 9608988]
